# Supplementary material for: Read mapping on de Bruijn graphs
Source: PubMed Central journal article supplement (PMC4910249; doi:10.1186/s12859-016-1103-9), 2016-06-16
Supplement: 12859_2016_1103_MOESM1_ESM.pdf [file 12859_2016_1103_MOESM1_ESM.pdf]

# Read mapping on De Bruijn graphs

## Additional file

Limasset et. al.

May 24, 2016

| Id                            | Species          | nb reads      | mean read length | coverage |
|-------------------------------|------------------|---------------|------------------|----------|
| SRR959239                     | <i>E.Coli</i>    | 5,372,832     | 98               | 114X     |
| SRR065390                     | <i>C.Elegans</i> | 67,617,092    | 100              | 68X      |
| SRR1522085                    | <i>C.Elegans</i> | 46,299,804    | 51               | 12X      |
| SRR345593<br>and<br>SRR345594 | <i>Human</i>     | 3,040,306,840 | 100              | 95X      |

Table 1: Main characteristics of data sets used in this study. Presented read numbers are not the same than those in input of *GGMAP* because we only try to align read without 'N'

| Reads set        | Assembler | $k$ | $c$ | Mapping on assembly | Mapping on CDBG |
|------------------|-----------|-----|-----|---------------------|-----------------|
|                  |           |     |     | Mapping rate        | Mapping rate    |
| <i>E.coli</i>    | Velvet    | 31  | 3   | 95.57%              | 97.17%          |
| //               | Minia     | //  | //  | 96.19%              | //              |
| <i>C.elegans</i> | Velvet    | 21  | 2   | 56.33%              | 89.15%          |
| //               | Minia     | //  | //  | 51.43%              | //              |
| //               | Velvet    | 31  | 3   | 80.60%              | 92.34%          |
| //               | Minia     | //  | //  | 80.43%              | //              |
| Human            | Minia     | 31  | 10  | 63.16%              | 85.51%          |

Table 2: Assembly and mapping approach comparison . Columns  $k$  and  $c$  are the assembly main parameters for Velvet and Minia ( $k$  is the length of  $k$ -mers and  $c$  the minimum coverage for a  $k$ -mers to be considered). The last column recalls the overall rate of reads mapped using *GMAP* on the CDBG obtained with the same read sets and  $k$  and  $c$  parameters. Because of limited computational resources, Velvet was not tested on the Human data-set. The '//' symbol indicates same value(s) between two consecutive lines.

| Graph                 | Mapped set (nb reads)                   | Mapping Strategy | Nb reads mapped (on branching parts of DBG) | Nb reads fully mapped on unitigs | Overall nb mapped reads |
|-----------------------|-----------------------------------------|------------------|---------------------------------------------|----------------------------------|-------------------------|
| <i>E.coli</i>         | SRR959239 (5,128,790)                   | Greedy           | 687,074 (13.40%)                            | 4,296,710 (83.78%)               | 4,983,784 (97.17%)      |
| //                    | //                                      | Complete         | 688,929 (13.43%)                            | 4,295,814 (83.76%)               | 4,984,743 (97.19%)      |
| <i>C.elegans_cpx</i>  | SRR065390 (67,617,092)                  | Greedy           | 44,686,355 (66.09%)                         | 15,592,918 (23.06%)              | 60,279,273 (89.15%)     |
| <i>C.elegans_norm</i> | //                                      | Greedy           | 13,994,715 (20.70%)                         | 48,442,146 (71.64%)              | 62,436,861 (92.34%)     |
| <i>C.elegans_norm</i> | SRR1522085 (22,509,110)                 | Greedy           | 3,523,416 (15.65%)                          | 16,682,194 (74.11%)              | 20,205,610 (89.77%)     |
| Human                 | SRR345593 and SRR345594 (2,967,536,821) | Greedy           | 1,004,182,363 (33.84%)                      | 1,533,456,046 (51.67%)           | 2,537,638,409 (85.51%)  |

Table 3: Results of *BGREAT* on real read sets. We remind that the column “*Nb reads fully mapped on unitigs*” corresponds to the number of reads mapped by Bowtie2 with defaults parameters. We also remind that reads from SRR1522085 are mapped on the CDBG obtained using reads from read set SRR065390. For all other lines, the same read set was used both for constructing the CDBG and during the mapping.
